# Supplementary material
Source: bioRxiv or medRxiv preprint supplement (https://www.biorxiv.org/highwire/filestream/50257/field_highwire_adjunct_files/1/168518-2.pdf)
Supplement: Supplementary file [file 168518-2.pdf]

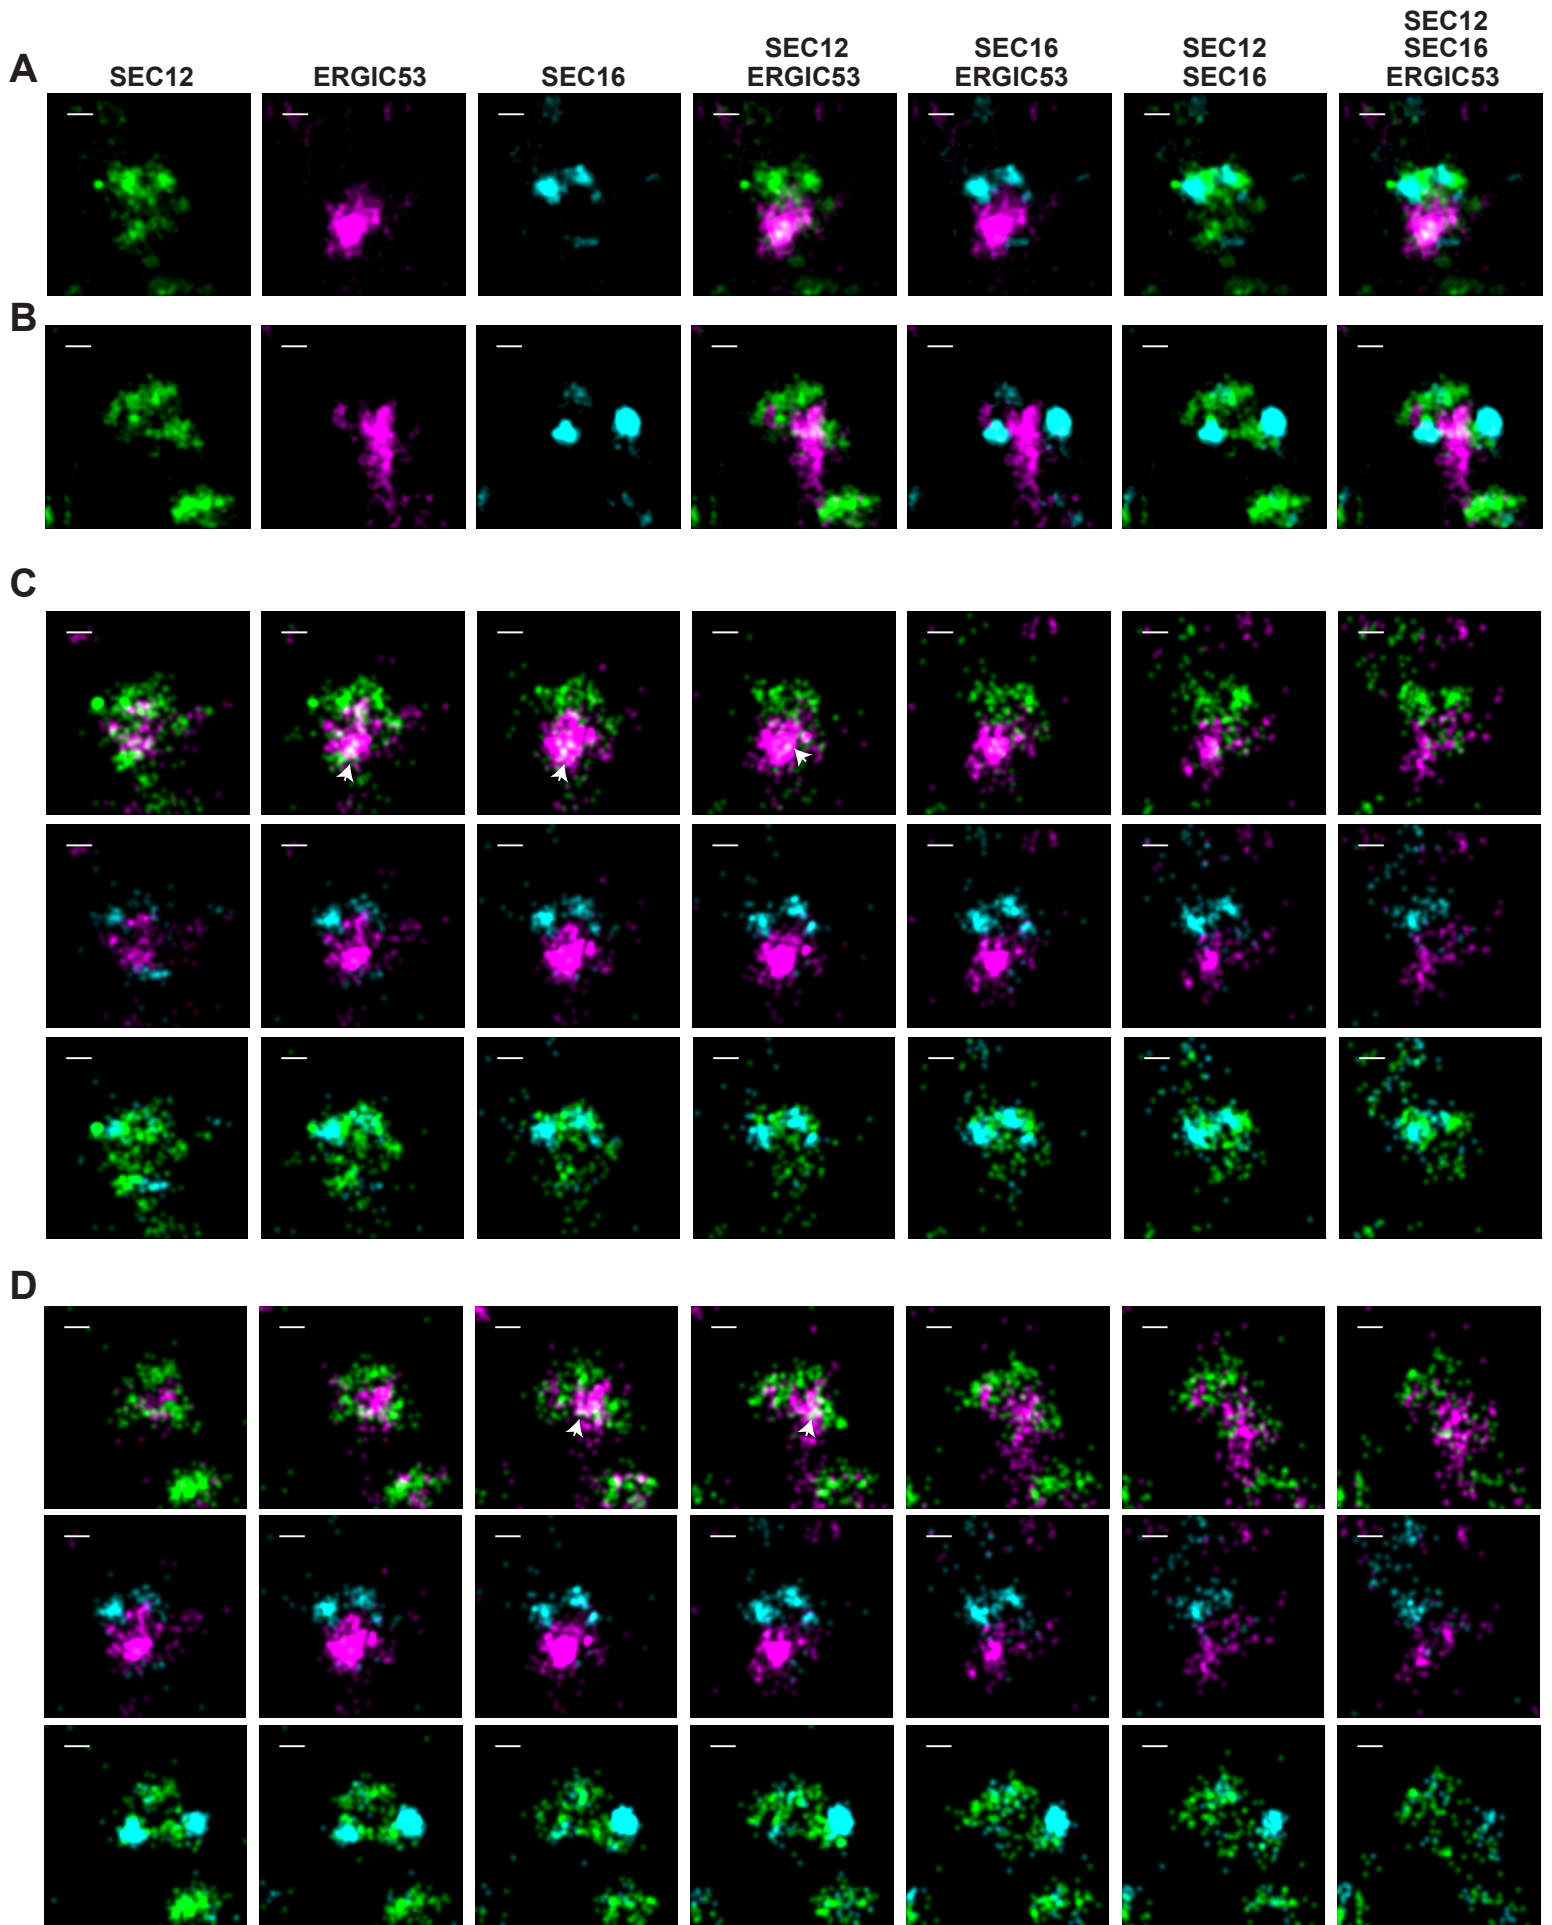

Appendix Figure S2
